# Supplementary material
Source: PubMed Central journal article supplement (PMC3185219)
Supplement: NIHMS319258-supplement-1_si_001.pdf [file NIHMS319258-supplement-1_si_001.pdf]

# Supplementary Information for

## Replacement of a Thiourea with an Amidine Group in a Monofunctional Platinum–acridine Antitumor Agent. Effect on DNA Interactions, DNA Adduct Recognition and Repair

Hana Kostrhunova<sup>†</sup>, Jaroslav Malina<sup>†</sup>, Amanda J. Pickard<sup>‡</sup>, Jana Stepankova<sup>†</sup>, Marie Vojtiskova<sup>†</sup>, Jana Kašpárková<sup>†</sup>, Tereza Muchova<sup>§</sup>, Matthew L. Rohlfiing<sup>‡</sup>, Ulrich Bierbach<sup>‡</sup>, and Viktor Brabec<sup>\*,†</sup>

<sup>†</sup>Institute of Biophysics, Academy of Sciences of the Czech Republic, Kralovopolska 135, CZ-61265 Brno, Czech Republic, <sup>‡</sup>Department of Chemistry, Wake Forest University, Winston-Salem, North Carolina 27109, USA and <sup>§</sup>Department of Biophysics, Faculty of Sciences, Palacky University, 17. listopadu 12, CZ-77146 Olomouc, Czech Republic

**Table S1.** Cartesian Coordinates for Optimized Structures

|             |             |             |             |                  |             |             |             |
|-------------|-------------|-------------|-------------|------------------|-------------|-------------|-------------|
| <b>9MeA</b> |             |             |             | H                | 3.46413700  | 1.15884600  | -0.00023600 |
| C           | 3.09562300  | 0.55580500  | 0.00029000  | N                | 1.41780800  | 1.79788900  | 0.00012400  |
| N           | 1.81388200  | -0.15611200 | -0.00006500 | C                | 0.25103200  | 1.02471800  | 0.00008300  |
| C           | 1.59265800  | -1.53621700 | -0.00023300 | C                | -1.13774300 | 1.41747800  | 0.00004100  |
| H           | 2.40657500  | -2.24638100 | -0.00022900 | N                | -1.99248500 | 0.24371700  | -0.00010700 |
| N           | 0.29758800  | -1.86305900 | -0.00005800 | C                | -1.56735000 | -1.07684400 | -0.00011600 |
| C           | -0.36952200 | -0.62959600 | 0.00011700  | N                | -0.28243900 | -1.42042100 | -0.00011100 |
| C           | -1.74606500 | -0.28044400 | 0.00007800  | C                | 0.57489100  | -0.34916100 | -0.00012000 |
| N           | -2.73650100 | -1.21981700 | 0.00008100  | H                | 2.07639100  | -2.49233300 | -0.00170500 |
| H           | -3.70022300 | -0.91658100 | 0.00001800  | H                | 3.39485400  | -1.68856100 | -0.89214000 |
| H           | -2.50153200 | -2.20237000 | 0.00020200  | H                | 3.39157700  | -1.68995300 | 0.89490900  |
| N           | -2.08436100 | 1.04267900  | 0.00003300  | N                | -2.52790600 | -2.06167400 | -0.00001300 |
| C           | -1.09209400 | 1.97660000  | 0.00025300  | H                | -2.20913400 | -3.01963600 | 0.00059400  |
| H           | -1.41705100 | 3.01188700  | -0.00081800 | H                | -3.51680900 | -1.86460200 | 0.00075200  |
| N           | 0.24624500  | 1.76135000  | -0.00032900 | O                | -1.67338000 | 2.54727100  | 0.00015400  |
| C           | 0.55538900  | 0.43949400  | -0.00015500 | H                | -2.98397900 | 0.46870400  | -0.00062300 |
| H           | 2.88065400  | 1.62757200  | -0.00260600 |                  |             |             |             |
| H           | 3.67745000  | 0.31063500  | 0.89595000  | <b>PT-AMD-Cl</b> |             |             |             |
| H           | 3.68022200  | 0.30609500  | -0.89225600 | Pt               | -0.80304200 | 0.17425000  | -0.11428700 |
|             |             |             |             | Cl               | -0.23075900 | 2.37946700  | 0.61986200  |
| <b>9MeG</b> |             |             |             | N                | 1.11400600  | -0.14352900 | -0.71042400 |
| C           | 2.76062200  | -1.64019400 | 0.00026900  | N                | 3.45501700  | -0.09435500 | -0.55634800 |
| N           | 1.95719200  | -0.41467900 | -0.00033500 | N                | -1.53066900 | -1.71599300 | -0.71996800 |
| C           | 2.41268400  | 0.91326200  | -0.00010400 | H                | -1.57054800 | -1.74027200 | -1.74490500 |

|   |             |             |             |
|---|-------------|-------------|-------------|
| H | -0.89390100 | -2.45652800 | -0.41017900 |
| N | -2.79552000 | 0.50662800  | 0.42468900  |
| H | -2.85549100 | 0.50173000  | 1.44906300  |
| H | -3.06239900 | 1.44544100  | 0.10787900  |
| C | 2.22808700  | -0.18374000 | 0.02855500  |
| C | 4.73913100  | -0.18430000 | 0.17521000  |
| H | 5.37571700  | -0.94510100 | -0.29141800 |
| H | 4.59063600  | -0.46124200 | 1.21704000  |
| C | 2.10467500  | -0.36879800 | 1.53081900  |
| H | 1.12271600  | 0.00740100  | 1.82403100  |
| H | 2.84019300  | 0.25420500  | 2.04918800  |
| C | 2.24625300  | -1.85183200 | 1.96286100  |
| H | 2.12984000  | -1.93337500 | 3.04921000  |
| H | 3.22205100  | -2.27487100 | 1.69688800  |
| H | 1.47321800  | -2.47245300 | 1.49226000  |
| C | 3.57391400  | 0.15233000  | -2.01020700 |
| H | 3.02562300  | 1.05786100  | -2.30234900 |
| H | 3.20908900  | -0.70283900 | -2.59652400 |
| H | 4.62522700  | 0.30512800  | -2.26033500 |
| C | -2.91435300 | -1.90284400 | -0.12462400 |
| H | -3.46732000 | -2.68407100 | -0.65904300 |
| H | -2.78354100 | -2.22142100 | 0.91463700  |
| C | -3.66662300 | -0.56613700 | -0.18855400 |
| H | -4.62871800 | -0.64167900 | 0.33112200  |
| H | -3.86056500 | -0.28055600 | -1.22768600 |
| H | 5.25973400  | 0.78053000  | 0.14092000  |
| H | 1.24226400  | -0.01766200 | -1.71308300 |

PT-AMD-AQ

|    |             |             |             |
|----|-------------|-------------|-------------|
| Pt | 0.83918000  | 0.13764100  | -0.25709600 |
| N  | -1.09361500 | -0.45621000 | -0.52406100 |
| N  | -3.39818000 | -0.70726800 | -0.14844500 |
| N  | 1.36691100  | -1.58780600 | 0.71319300  |
| H  | 1.01306100  | -1.54541400 | 1.67787900  |
| H  | 0.92865400  | -2.40226100 | 0.26582700  |
| N  | 2.88196800  | 0.61674700  | -0.02040100 |
| H  | 3.34955400  | 0.54156700  | -0.93280700 |
| H  | 3.00759100  | 1.58247400  | 0.30448600  |
| C  | -2.19231700 | -0.22806400 | 0.22833900  |
| C  | -4.65646600 | -0.53196000 | 0.62750800  |
| H  | -5.37598000 | 0.04592400  | 0.03709700  |
| H  | -4.48610900 | -0.01612600 | 1.57011500  |
| C  | -2.05010100 | 0.60506200  | 1.49320400  |
| H  | -0.98927400 | 0.62650400  | 1.76270500  |
| H  | -2.57550400 | 0.12452500  | 2.32547400  |
| C  | -2.55860100 | 2.06264800  | 1.32409900  |
| H  | -2.39263700 | 2.62191900  | 2.25049300  |
| H  | -3.62762100 | 2.10761200  | 1.09467600  |
| H  | -2.02921400 | 2.58310300  | 0.51402700  |
| C  | -3.54982200 | -1.47744400 | -1.40965200 |
| H  | -2.96600300 | -2.40711600 | -1.38211000 |
| H  | -3.25528100 | -0.87743600 | -2.28077900 |
| H  | -4.59864900 | -1.74837700 | -1.53602800 |

|   |             |             |             |
|---|-------------|-------------|-------------|
| C | 2.88900200  | -1.73971900 | 0.71912800  |
| H | 3.19036200  | -2.45620000 | 1.49037300  |
| H | 3.18347600  | -2.13656900 | -0.25723900 |
| C | 3.50251900  | -0.36045000 | 0.96920800  |
| H | 4.59079100  | -0.39150900 | 0.85288800  |
| H | 3.27654200  | -0.00219400 | 1.97852100  |
| H | -5.08560200 | -1.51595100 | 0.84394800  |
| H | -1.24037900 | -0.98055600 | -1.38598600 |
| O | 0.45239900  | 1.96819600  | -1.24525400 |
| H | -0.04772100 | 2.68609100  | -0.81146700 |
| H | 0.44984100  | 2.03974900  | -2.21958100 |

PT-AMD-TS-A

|    |             |             |             |
|----|-------------|-------------|-------------|
| Pt | -0.50924200 | 0.82659500  | 0.22100200  |
| O  | -0.69001200 | 0.36954500  | 2.63009000  |
| N  | 0.63215800  | 2.56098900  | 0.53435300  |
| N  | -0.96348100 | 1.78496800  | -1.58473000 |
| C  | 0.76838300  | 3.33280200  | -0.76818200 |
| H  | 1.56618100  | 2.86211100  | -1.35118200 |
| H  | 1.04859600  | 4.37404900  | -0.57679100 |
| C  | -0.56752900 | 3.25020100  | -1.50788600 |
| H  | -0.48521300 | 3.67670600  | -2.51390800 |
| H  | -1.35623400 | 3.78185400  | -0.96658600 |
| N  | -1.57106400 | -0.88802400 | -0.10244300 |
| N  | -3.35219600 | -2.39118900 | -0.40349400 |
| C  | -3.86332800 | 0.03450300  | -0.12140700 |
| H  | -4.60459300 | -0.01213500 | -0.92675400 |
| C  | -2.89046800 | -1.12869100 | -0.22606500 |
| C  | -2.41440000 | -3.53915900 | -0.45431200 |
| H  | -2.98443700 | -4.45801900 | -0.59709400 |
| H  | -1.71355400 | -3.44646600 | -1.29497300 |
| C  | -4.78572200 | -2.75113300 | -0.56737400 |
| H  | -4.91689900 | -3.29187400 | -1.51083900 |
| H  | -5.42656600 | -1.87223300 | -0.58427900 |
| H  | -5.10346900 | -3.39848200 | 0.25774100  |
| C  | -4.57669200 | 0.10139800  | 1.25718100  |
| H  | -5.18325000 | -0.78715800 | 1.45893200  |
| H  | -5.24165900 | 0.97097200  | 1.28551200  |
| H  | -3.84667900 | 0.20603600  | 2.06862000  |
| H  | -1.85252400 | -3.64028700 | 0.48410200  |
| N  | 3.37435400  | -1.03398700 | -2.44035600 |
| N  | 4.75516200  | -1.26389800 | -0.46397400 |
| N  | 1.43064200  | -0.55653100 | 0.75922600  |
| N  | 3.48914000  | -0.97062200 | 1.62491000  |
| C  | 4.56426900  | -1.22629700 | -1.80356500 |
| C  | 3.62441700  | -1.04244100 | 0.23581900  |
| C  | 2.33493700  | -0.79573300 | -0.30278500 |
| C  | 2.24163500  | -0.83891200 | -1.72235100 |
| C  | 2.17119300  | -0.67224500 | 1.88137800  |
| H  | 1.79134600  | -0.52568600 | 2.88022400  |
| C  | 4.58036200  | -1.20235000 | 2.59653600  |
| H  | 4.59768800  | -0.40523100 | 3.34501400  |
| H  | 5.52223700  | -1.20341700 | 2.04344900  |

|   |             |             |             |
|---|-------------|-------------|-------------|
| H | 4.45536400  | -2.17207700 | 3.08759900  |
| H | -0.87880100 | -0.57111800 | 2.82171200  |
| H | 0.17320800  | 3.14195300  | 1.24570500  |
| H | -0.37463500 | 1.29421400  | -2.27682500 |
| H | -3.29276600 | 0.95864700  | -0.24987800 |
| H | -0.96488400 | -1.70825700 | -0.07464000 |
| H | -1.20783400 | 0.95092400  | 3.22256600  |
| H | -1.94506500 | 1.69204400  | -1.86396800 |
| H | 1.55730900  | 2.30341300  | 0.89422600  |
| N | 1.06160600  | -0.68133000 | -2.44796700 |
| H | 5.43284600  | -1.37403800 | -2.43440700 |
| H | 0.18928900  | -0.96804300 | -2.01901800 |
| H | 1.16940900  | -0.86343800 | -3.44372700 |

PT-AMD-TS-G

|    |             |             |             |
|----|-------------|-------------|-------------|
| Pt | 0.96671600  | -0.92349900 | -0.14060800 |
| O  | 0.82375500  | -1.10705600 | 2.27588000  |
| N  | 0.51925100  | -2.97899100 | -0.32658000 |
| N  | 1.94427500  | -1.21407700 | -1.94276800 |
| C  | 0.86338400  | -3.43147000 | -1.73441300 |
| H  | 0.01846700  | -3.17215200 | -2.38073200 |
| H  | 1.00506600  | -4.51698400 | -1.77604700 |
| C  | 2.13404900  | -2.70394300 | -2.18387000 |
| H  | 2.34158600  | -2.89659700 | -3.24243700 |
| H  | 2.99982800  | -3.02442600 | -1.59625700 |
| N  | 1.42067400  | 1.05666400  | -0.12851800 |
| N  | 2.65266400  | 3.04388900  | 0.06722800  |
| C  | 3.68923600  | 0.90749800  | 0.83620200  |
| H  | 4.63702100  | 1.16564800  | 0.34968300  |
| C  | 2.54084700  | 1.69816500  | 0.22350900  |
| C  | 1.51652100  | 3.83032000  | -0.47111000 |
| H  | 1.79924300  | 4.88379500  | -0.49945900 |
| H  | 1.25482300  | 3.51130800  | -1.48706000 |
| C  | 3.86457600  | 3.83473800  | 0.39194200  |
| H  | 4.15935600  | 4.42013200  | -0.48610000 |
| H  | 4.70410900  | 3.20120000  | 0.67270600  |
| H  | 3.65629000  | 4.52505100  | 1.21805100  |
| C  | 3.81672500  | 1.10971300  | 2.37006900  |
| H  | 4.59230700  | 0.44779900  | 2.77114800  |
| H  | 2.86948900  | 0.88525400  | 2.87681400  |
| H  | 4.08993800  | 2.13600500  | 2.63368700  |
| H  | 0.62751000  | 3.72619700  | 0.16155100  |
| N  | -3.35200200 | 2.07709400  | -1.11566300 |
| N  | -4.77472400 | 0.62454500  | 0.14838000  |
| N  | -1.38868900 | -0.50471300 | 0.75181500  |
| N  | -3.49828400 | -1.05798600 | 1.38515000  |
| C  | -4.61478400 | 1.65886800  | -0.68704100 |
| C  | -3.61788400 | 0.02549400  | 0.52557000  |
| C  | -2.30435700 | 0.36732100  | 0.13803000  |
| C  | -2.11521600 | 1.48776000  | -0.73732300 |
| C  | -2.14489700 | -1.33886600 | 1.48902300  |
| H  | -1.76590200 | -2.13175100 | 2.11604300  |
| C  | -4.61982700 | -1.73932300 | 2.06141300  |

|   |             |             |             |
|---|-------------|-------------|-------------|
| H | -4.23149100 | -2.56840700 | 2.65820700  |
| H | -5.32406200 | -2.12215800 | 1.31790500  |
| H | -5.14410600 | -1.03558000 | 2.71369000  |
| H | 1.06469400  | -3.49805500 | 0.37095600  |
| H | 1.36673700  | -0.79584100 | -2.68268700 |
| H | 3.50110700  | -0.15184600 | 0.63394600  |
| H | 0.61997200  | 1.58903200  | -0.50661500 |
| H | 2.84701900  | -0.72748700 | -1.94487700 |
| H | -0.47354400 | -3.14307500 | -0.13280900 |
| N | -5.70501600 | 2.33141800  | -1.13624100 |
| H | -6.61353600 | 2.02157800  | -0.81313100 |
| H | -5.65876300 | 3.12241000  | -1.76416000 |
| O | -1.03230200 | 1.98158400  | -1.17015400 |
| H | -3.26276900 | 2.87664100  | -1.73990000 |
| H | 1.61779000  | -1.14595400 | 2.84539000  |
| H | 0.18907200  | -0.42757100 | 2.58245100  |

PT-AMD-A

|    |             |             |             |
|----|-------------|-------------|-------------|
| Pt | -1.00029200 | -0.69905400 | -0.06718900 |
| N  | 3.51348400  | 0.04755100  | -2.21022100 |
| N  | 4.50498300  | -0.34734100 | -0.03414300 |
| N  | 0.97495300  | -0.81248500 | 0.43851000  |
| N  | 2.84526600  | -0.91488300 | 1.68724000  |
| N  | -3.03362000 | -0.67919700 | -0.59108100 |
| H  | -3.57722700 | -0.24981000 | 0.16721700  |
| H  | -3.17771400 | -0.10455700 | -1.42903200 |
| N  | -1.36716900 | -2.76097900 | 0.23045000  |
| H  | -0.92029600 | -3.27949800 | -0.53581200 |
| H  | -0.95592600 | -3.10675700 | 1.10442200  |
| C  | 4.56507200  | -0.01877400 | -1.34813200 |
| C  | 3.24864700  | -0.58690300 | 0.38687400  |
| C  | 2.07453300  | -0.53199900 | -0.39976400 |
| C  | 2.25522800  | -0.22048200 | -1.77849700 |
| C  | 1.48593700  | -1.03234900 | 1.67233800  |
| H  | 0.90486800  | -1.25378700 | 2.55372100  |
| C  | -3.50876700 | -2.10558600 | -0.83004500 |
| H  | -3.19725600 | -2.39619900 | -1.83844700 |
| C  | -2.86962600 | -3.00907500 | 0.22740000  |
| H  | -3.08680500 | -4.06267300 | 0.02155900  |
| H  | -3.24740500 | -2.77211900 | 1.22729100  |
| C  | -1.03205900 | 2.38441300  | 0.19895400  |
| C  | -0.07346900 | 3.76237600  | -1.60745500 |
| H  | 0.09220200  | 4.82248700  | -1.80346700 |
| H  | -0.70036800 | 3.36392300  | -2.41616700 |
| C  | -0.65473000 | 2.42951600  | 2.73038700  |
| H  | -0.22757200 | 3.43725000  | 2.74250600  |
| C  | 3.76399300  | -1.09240200 | 2.83411400  |
| H  | 3.18275600  | -1.27386800 | 3.74145400  |
| H  | 4.42865800  | -1.93917600 | 2.64368800  |
| H  | 4.36941100  | -0.19074000 | 2.95555000  |
| H  | -1.15659000 | 2.26996800  | 3.69071100  |
| H  | 0.17289100  | 1.71483100  | 2.65080400  |
| H  | 0.90405800  | 3.26331400  | -1.62033000 |

|   |             |             |             |
|---|-------------|-------------|-------------|
| N | -0.73849200 | 3.61334200  | -0.28896900 |
| C | -1.04751400 | 4.89284600  | 0.40166100  |
| H | -0.11742600 | 5.42976300  | 0.61920500  |
| H | -1.66993500 | 5.51559100  | -0.25004200 |
| H | -1.58148300 | 4.73351400  | 1.33615000  |
| N | -0.74172100 | 1.27806600  | -0.50938600 |
| C | -1.66936400 | 2.23304800  | 1.57096500  |
| H | -2.50796900 | 2.92864400  | 1.68355900  |
| H | -2.08034200 | 1.22076500  | 1.63791300  |
| H | -4.60156600 | -2.16179600 | -0.78086200 |
| H | -0.23013000 | 1.41436300  | -1.38314500 |
| N | 1.23535400  | -0.14245000 | -2.70300500 |
| H | 1.52198900  | 0.02654800  | -3.66325000 |
| H | 0.36076300  | -0.62847300 | -2.54439600 |
| H | 5.54262100  | 0.20555300  | -1.75866600 |

|   |             |             |             |
|---|-------------|-------------|-------------|
| H | 4.09961900  | -0.67932600 | 3.28701200  |
| H | -1.85526900 | 1.77937500  | 3.81901700  |
| H | -0.43004100 | 1.49741900  | 2.79576700  |
| H | 0.20372400  | 3.56306600  | -1.33765700 |
| N | -1.50958100 | 3.50445900  | -0.04942400 |
| C | -2.02163700 | 4.67323300  | 0.70757500  |
| H | -1.19883500 | 5.36620600  | 0.91684100  |
| H | -2.77814100 | 5.19699500  | 0.11195300  |
| H | -2.46962500 | 4.38077000  | 1.65534100  |
| N | -1.09472500 | 1.22324500  | -0.37904900 |
| C | -2.28234800 | 1.87581500  | 1.68126900  |
| H | -3.20360300 | 2.45470200  | 1.80474600  |
| H | -2.56585500 | 0.81917300  | 1.64687500  |
| H | -4.29276900 | -2.59828800 | -1.57364300 |
| H | -0.51577900 | 1.45423400  | -1.19442000 |

PT-AMD-G

|    |             |             |             |
|----|-------------|-------------|-------------|
| Pt | -1.09452700 | -0.79374400 | -0.13343800 |
| O  | 1.14204100  | 0.90869600  | -2.14522300 |
| N  | 3.42276900  | 0.76495200  | -1.69698400 |
| H  | 3.55898800  | 1.25533000  | -2.57951300 |
| N  | 4.38064900  | -0.17538300 | 0.28714700  |
| N  | 0.83318600  | -0.72727700 | 0.55695800  |
| N  | 2.68249400  | -1.11188700 | 1.77919000  |
| N  | 5.76155100  | 0.76007300  | -1.33863900 |
| H  | 5.94381700  | 1.21518300  | -2.22333800 |
| H  | 6.54858800  | 0.51929500  | -0.74773300 |
| N  | -3.02518900 | -0.96958800 | -0.91716600 |
| H  | -3.71987300 | -0.75269800 | -0.19283500 |
| H  | -3.14303200 | -0.28570700 | -1.67321700 |
| N  | -1.17484100 | -2.91387000 | -0.14957700 |
| H  | -0.55194900 | -3.23702600 | -0.89989200 |
| H  | -0.84369800 | -3.33299500 | 0.72539700  |
| C  | 4.52120300  | 0.43825300  | -0.89803600 |
| C  | 3.10176100  | -0.47677200 | 0.61272100  |
| C  | 1.94276700  | -0.22314500 | -0.14326300 |
| C  | 2.06008000  | 0.49795400  | -1.38284200 |
| C  | 1.31502800  | -1.24416200 | 1.70401800  |
| H  | 0.72304700  | -1.68974300 | 2.48731600  |
| C  | -3.22741900 | -2.38479700 | -1.43385900 |
| H  | -2.73172100 | -2.45517200 | -2.40716200 |
| C  | -2.60467900 | -3.35551000 | -0.42691000 |
| H  | -2.62619000 | -4.38081300 | -0.81185300 |
| H  | -3.14746900 | -3.33552700 | 0.52366000  |
| C  | -1.60811200 | 2.21407600  | 0.36103700  |
| C  | -0.86086400 | 3.82801800  | -1.34314600 |
| H  | -0.94563000 | 4.90052300  | -1.52458600 |
| H  | -1.35100000 | 3.30207900  | -2.17241100 |
| C  | -1.34581800 | 2.09121900  | 2.90085700  |
| H  | -1.05558400 | 3.14031800  | 3.02080300  |
| C  | 3.57183300  | -1.54485500 | 2.87810200  |
| H  | 2.97441800  | -2.01376100 | 3.66360000  |
| H  | 4.30567400  | -2.26015900 | 2.49756900  |

PT-TU-CI

|    |             |             |             |
|----|-------------|-------------|-------------|
| Pt | 0.84877600  | 0.04863100  | -0.00647500 |
| S  | -0.97092000 | -1.46363500 | -0.58639300 |
| Cl | -0.56358600 | 1.80948900  | 0.82443600  |
| N  | 2.52712500  | 1.24045300  | 0.41726200  |
| H  | 2.38395100  | 1.68127500  | 1.33222900  |
| H  | 2.56734700  | 1.98698500  | -0.28545600 |
| N  | 2.28850900  | -1.34719900 | -0.64605800 |
| H  | 2.01907000  | -1.76344200 | -1.54349400 |
| H  | 2.33432300  | -2.09903100 | 0.05105300  |
| N  | -3.17567400 | 0.21191000  | -0.86264500 |
| N  | -2.89737000 | -0.77185100 | 1.23393300  |
| H  | -3.69714600 | -0.23982500 | 1.56081900  |
| C  | 3.76123800  | 0.37012000  | 0.38513500  |
| H  | 3.82454000  | -0.14977100 | 1.34658800  |
| H  | 4.66815500  | 0.97309700  | 0.25964200  |
| C  | 3.62329400  | -0.63393400 | -0.76729300 |
| H  | 3.62941800  | -0.11642800 | -1.73208200 |
| H  | 4.45027700  | -1.35330400 | -0.75517500 |
| C  | -2.46466200 | -0.57227700 | -0.02901300 |
| C  | -2.72818600 | 0.58959100  | -2.22309700 |
| H  | -3.54807500 | 0.42782600  | -2.93073600 |
| H  | -1.87253700 | -0.01490700 | -2.51894600 |
| C  | -4.39294200 | 0.90573300  | -0.37554900 |
| H  | -4.14138100 | 1.62608700  | 0.41493300  |
| H  | -4.84006300 | 1.45539400  | -1.20452800 |
| H  | -5.13677400 | 0.18626600  | -0.00955900 |
| C  | -2.19810600 | -1.56514400 | 2.26444000  |
| H  | -2.82484000 | -1.57944600 | 3.16051600  |
| H  | -2.03635800 | -2.59020500 | 1.92273600  |
| H  | -1.23144300 | -1.11204800 | 2.50710400  |
| H  | -2.43925900 | 1.64735700  | -2.22893000 |

PT-TU-AQ

|    |             |             |             |
|----|-------------|-------------|-------------|
| Pt | -0.93955200 | -0.06956800 | -0.15643600 |
| S  | 1.12228200  | 1.11361100  | 0.45021600  |
| N  | -2.83063400 | -0.89291900 | -0.61019100 |

|   |             |             |             |
|---|-------------|-------------|-------------|
| H | -2.83181800 | -1.90467900 | -0.43487600 |
| H | -3.04036600 | -0.74676400 | -1.60572500 |
| N | -2.05992400 | 1.39784300  | 0.76378700  |
| H | -1.70772400 | 2.33567800  | 0.53474400  |
| H | -1.97746900 | 1.28076600  | 1.78233400  |
| N | 3.69915000  | 0.53654400  | -0.21652800 |
| N | 2.38283800  | -1.36543300 | 0.34074300  |
| H | 3.18959200  | -1.90471100 | 0.01885700  |
| C | -3.87910300 | -0.20345600 | 0.25305000  |
| H | -3.85950500 | -0.67451000 | 1.24075600  |
| H | -4.87805000 | -0.34152000 | -0.17400500 |
| C | -3.52185000 | 1.28064900  | 0.33561400  |
| H | -3.61776400 | 1.76818500  | -0.63952900 |
| H | -4.16499700 | 1.80519400  | 1.04981700  |
| C | 2.52503300  | 0.02913300  | 0.16720000  |
| C | 3.86822900  | 1.95516600  | -0.65658500 |
| H | 4.20077700  | 2.56812000  | 0.18837600  |
| H | 2.92817600  | 2.35155000  | -1.04229900 |
| C | 4.96943000  | -0.25602000 | -0.19940100 |
| H | 5.12804500  | -0.75786100 | -1.16140600 |
| H | 5.79741500  | 0.43503400  | -0.02987400 |
| H | 4.97534900  | -0.98231800 | 0.61815000  |
| C | 1.85556900  | -1.90817800 | 1.65216700  |
| H | 1.72751300  | -2.98809200 | 1.54377900  |
| H | 2.55510400  | -1.70205300 | 2.46868500  |
| H | 0.89153600  | -1.45171300 | 1.87895100  |
| H | 4.62556300  | 1.98267000  | -1.44412500 |
| O | 0.13169600  | -1.62153100 | -1.05074000 |
| H | 0.01783400  | -1.89942000 | -1.97818000 |
| H | 1.07187800  | -1.70880300 | -0.66690400 |

PT-TU-TS-A

|    |             |             |             |
|----|-------------|-------------|-------------|
| Pt | 0.66271300  | 0.98232400  | -0.36590500 |
| O  | -0.61142900 | 0.71338300  | -2.34064800 |
| N  | -0.14384300 | 2.90890500  | -0.24928800 |
| N  | 2.37569000  | 1.90401300  | 0.38336600  |
| C  | 0.80944200  | 3.82663200  | 0.49091000  |
| H  | 0.61000600  | 3.72347400  | 1.56271500  |
| H  | 0.63929300  | 4.87242100  | 0.21273800  |
| C  | 2.24489900  | 3.40668600  | 0.16109100  |
| H  | 2.96407600  | 3.94958600  | 0.78485100  |
| H  | 2.48088400  | 3.60130300  | -0.88948500 |
| S  | 1.70804200  | -1.17139400 | -0.88548600 |
| N  | 2.33312400  | -1.97478800 | 1.75528200  |
| N  | 3.77618700  | -2.63185100 | 0.04306200  |
| H  | 4.21597100  | -3.26518000 | 0.70492000  |
| C  | 2.66484100  | -1.96823200 | 0.44099200  |
| C  | 0.98618800  | -1.63369400 | 2.26743900  |
| H  | 1.07369700  | -0.88625000 | 3.06485400  |
| H  | 0.35533200  | -1.24009700 | 1.47272500  |
| C  | 3.24784100  | -2.57930600 | 2.76272900  |
| H  | 4.27536700  | -2.22703900 | 2.61856500  |
| H  | 3.22126800  | -3.67754300 | 2.72749500  |

|   |             |             |             |
|---|-------------|-------------|-------------|
| H | 2.92285700  | -2.26961100 | 3.75770200  |
| C | 4.35500900  | -2.65586800 | -1.32189300 |
| H | 5.36925600  | -3.05697100 | -1.25114300 |
| H | 4.39679300  | -1.64802600 | -1.74117000 |
| H | 3.76604400  | -3.29194800 | -1.99088500 |
| H | 0.51965300  | -2.53478700 | 2.68512600  |
| N | -1.65002600 | -1.71811800 | -2.22415600 |
| N | -3.93366700 | -2.03749600 | -1.66846600 |
| N | -5.00538700 | -1.14758300 | 0.31299900  |
| N | -1.59469400 | 0.04042900  | 0.42304600  |
| N | -3.47570800 | 0.18914300  | 1.70279400  |
| C | -5.01154600 | -1.83627100 | -0.85110700 |
| C | -3.80662600 | -0.60519100 | 0.60559000  |
| C | -2.62612100 | -0.70975900 | -0.17748800 |
| C | -2.74041100 | -1.50464600 | -1.34267000 |
| C | -2.15495900 | 0.54493900  | 1.54253900  |
| H | -1.63883200 | 1.15594600  | 2.26843800  |
| C | -4.39849700 | 0.55325900  | 2.79734800  |
| H | -3.88157300 | 1.20460700  | 3.50685900  |
| H | -4.73966300 | -0.35006000 | 3.31014200  |
| H | -5.26882500 | 1.07280000  | 2.38763300  |
| H | -1.08438200 | -0.18953300 | -2.46387000 |
| H | -1.06509200 | 2.88284300  | 0.20052700  |
| H | -0.29122700 | 3.21476400  | -1.21920100 |
| H | 3.19822700  | 1.54192900  | -0.11136300 |
| H | 2.48798000  | 1.69618100  | 1.38188400  |
| H | -0.79902700 | -2.07849400 | -1.78327200 |
| H | -1.93279000 | -2.26584600 | -3.03969000 |
| H | -0.16754700 | 1.00015000  | -3.16260500 |
| H | -5.94869700 | -2.28055600 | -1.16431700 |

PT-TU-TS-G

|    |             |             |             |
|----|-------------|-------------|-------------|
| Pt | 0.64909300  | -0.74708700 | -0.17202700 |
| O  | -0.33255000 | -1.06702300 | 2.03197300  |
| N  | -0.36329300 | -2.56434100 | -0.41831900 |
| N  | 1.95202700  | -1.57592800 | -1.57269000 |
| C  | 0.07704500  | -3.20098300 | -1.71071200 |
| H  | -0.43034500 | -2.68542700 | -2.53200900 |
| H  | -0.20110300 | -4.26091800 | -1.74420600 |
| C  | 1.59756300  | -3.04039100 | -1.81116600 |
| H  | 1.96821600  | -3.36626400 | -2.78913000 |
| H  | 2.10074500  | -3.62760400 | -1.03594400 |
| S  | 1.89546100  | 1.35583700  | 0.05401400  |
| N  | 4.60580000  | 1.80615800  | 0.03243500  |
| N  | 3.90519100  | 0.23697700  | 1.61085200  |
| H  | 4.88469900  | 0.08115100  | 1.82881900  |
| C  | 3.60706200  | 1.08096700  | 0.59040000  |
| C  | 4.45318200  | 2.64058900  | -1.18751900 |
| H  | 5.29566600  | 2.44415900  | -1.85879700 |
| H  | 3.51972300  | 2.40762000  | -1.69899900 |
| C  | 5.95484500  | 1.85462400  | 0.66119400  |
| H  | 6.52632500  | 0.93634500  | 0.46840300  |
| H  | 5.87474200  | 2.02640400  | 1.74096600  |

|   |             |             |             |
|---|-------------|-------------|-------------|
| H | 6.50923000  | 2.69055600  | 0.23224800  |
| C | 2.94087500  | -0.35656400 | 2.56136700  |
| H | 3.50809700  | -0.88573800 | 3.33166400  |
| H | 2.26730700  | -1.06011400 | 2.06541100  |
| H | 2.34517300  | 0.43002900  | 3.03763700  |
| H | 4.45271300  | 3.70281500  | -0.91767700 |
| N | -4.71247500 | -0.63183100 | 0.77891800  |
| H | -5.18023900 | -1.44501700 | 1.17608600  |
| N | -4.87086500 | 1.58669300  | -0.11638400 |
| N | -1.35722400 | 0.71866600  | -0.14860300 |
| N | -2.66805600 | 2.48231900  | -0.72263800 |
| C | -5.45337500 | 0.49370800  | 0.39464500  |
| C | -3.52274500 | 1.50994900  | -0.22986600 |
| C | -2.70210000 | 0.41714300  | 0.12781000  |
| C | -3.31269400 | -0.74173600 | 0.67784900  |
| C | -1.38242200 | 1.95839400  | -0.65387000 |
| H | -0.51852600 | 2.51904500  | -0.97466800 |
| C | -3.07242800 | 3.81479300  | -1.21238600 |
| H | -2.18792400 | 4.35129500  | -1.56394300 |
| H | -3.54462900 | 4.38148700  | -0.40516700 |
| H | -3.78447000 | 3.70781900  | -2.03514300 |
| H | -0.27263900 | -0.41984400 | 2.75993600  |
| H | -1.26943100 | -1.38685300 | 1.87845900  |
| H | -1.38328000 | -2.43213100 | -0.33680900 |
| H | -0.08706400 | -3.13770400 | 0.38900000  |
| H | 2.92722500  | -1.49242400 | -1.26935600 |
| H | 1.84403700  | -1.03389300 | -2.43771300 |
| O | -2.72159900 | -1.81261900 | 1.07138700  |
| N | -6.80062500 | 0.46074100  | 0.55139700  |
| H | -7.32570600 | 1.28109900  | 0.27309900  |
| H | -7.30420400 | -0.32850100 | 0.93356900  |

PT-TU-A

|    |             |             |             |
|----|-------------|-------------|-------------|
| Pt | -0.26377800 | 0.62526200  | -0.08966500 |
| S  | -1.46172700 | -1.33263300 | 0.75783500  |
| N  | -4.05403700 | -1.63514400 | 1.44562200  |
| N  | -3.80921800 | -0.83472700 | -0.73964200 |
| N  | -1.85933000 | 1.97565500  | 0.00361100  |
| N  | 0.81785700  | 2.34646600  | -0.66391000 |
| C  | -3.24811000 | -1.23608700 | 0.43898700  |
| C  | -3.08211100 | -0.87473300 | -2.03671500 |
| C  | -3.63883400 | -1.98224600 | 2.82799600  |
| C  | -5.29297400 | -0.75721500 | -0.87268400 |
| C  | -1.50103100 | 3.22470600  | -0.79133100 |
| C  | -0.04410000 | 3.58092400  | -0.48756500 |
| N  | 4.68122600  | 0.64401900  | 1.13297900  |
| N  | 4.87292500  | -1.44283300 | -0.07659000 |
| N  | 1.38787700  | -0.58296600 | -0.22695500 |
| N  | 2.71817900  | -2.26170600 | -0.92899800 |
| C  | 5.39208200  | -0.39150100 | 0.60046800  |
| C  | 3.54061200  | -1.36004800 | -0.24486800 |
| C  | 2.70221300  | -0.31519700 | 0.21645100  |
| C  | 3.33990400  | 0.69542000  | 0.98288800  |

|   |             |             |             |
|---|-------------|-------------|-------------|
| C | 1.45189100  | -1.75871900 | -0.89538200 |
| H | -4.52887800 | -1.96842800 | 3.46211700  |
| H | -2.91564400 | -1.25548800 | 3.20416200  |
| H | -3.18861900 | -2.97967700 | 2.86319500  |
| H | -5.73185800 | -0.20641800 | -0.03358300 |
| H | -5.53343400 | -0.21824800 | -1.79109900 |
| H | -3.38127600 | -0.01706600 | -2.64816200 |
| H | -2.00512200 | -0.84398800 | -1.87612600 |
| H | -3.33854500 | -1.79331300 | -2.57975000 |
| H | -5.74788800 | -1.75560400 | -0.94227800 |
| H | -2.17089000 | 4.05177300  | -0.53078200 |
| H | -1.63475500 | 2.99008600  | -1.85187600 |
| H | 0.30117700  | 4.38857700  | -1.14164200 |
| H | 0.06711600  | 3.91883000  | 0.54850500  |
| H | 1.65073100  | 2.40192200  | -0.04006100 |
| H | 1.12871600  | 2.25088200  | -1.63695800 |
| H | -2.02223700 | 2.21692000  | 0.98886800  |
| H | -2.72311200 | 1.55432600  | -0.35556300 |
| H | 0.60716000  | -2.24901600 | -1.35055000 |
| H | 6.46516000  | -0.37308200 | 0.74867800  |
| C | 3.18241300  | -3.51784400 | -1.55959000 |
| H | 2.34466100  | -3.99662500 | -2.07194100 |
| H | 3.97562600  | -3.29185100 | -2.27659500 |
| H | 3.57900200  | -4.18770600 | -0.79218500 |
| H | -5.03195400 | -1.81774300 | 1.23518000  |
| N | 2.65936400  | 1.78020600  | 1.55956300  |
| H | 3.28566700  | 2.40367100  | 2.07023900  |
| H | 1.79586900  | 1.56141000  | 2.05499400  |

PT-TU-G

|    |             |             |             |
|----|-------------|-------------|-------------|
| Pt | -0.51075600 | 0.68043300  | -0.09352500 |
| S  | -1.58782100 | -1.37310500 | 0.73425000  |
| N  | -4.15207500 | -1.84283400 | 1.43016400  |
| N  | -3.97344200 | -0.94194100 | -0.72079200 |
| N  | -2.14863600 | 1.91045800  | 0.31169900  |
| N  | 0.39533600  | 2.49953000  | -0.60086700 |
| C  | -3.37626100 | -1.36295700 | 0.43244800  |
| C  | -3.26170500 | -0.86732400 | -2.02369200 |
| C  | -3.70070200 | -2.22480300 | 2.79064500  |
| C  | -5.45964300 | -0.93021200 | -0.83468400 |
| C  | -1.93496900 | 3.28100800  | -0.31809700 |
| C  | -0.46284500 | 3.65213800  | -0.13465100 |
| N  | 4.53819300  | 0.73753700  | 0.77912300  |
| N  | 4.62464200  | -1.48402900 | -0.10016200 |
| N  | 1.18760300  | -0.44417300 | -0.43477400 |
| N  | 2.45400800  | -2.24283200 | -0.92183300 |
| C  | 5.22940800  | -0.43935000 | 0.48430100  |
| C  | 3.30496800  | -1.30946100 | -0.33896500 |
| C  | 2.51971500  | -0.17666200 | -0.04791700 |
| C  | 3.16823500  | 0.97175200  | 0.51631000  |
| C  | 1.19977200  | -1.68698000 | -0.95650000 |
| H  | -4.58275800 | -2.29727800 | 3.43208200  |
| H  | -3.02102300 | -1.47101200 | 3.19426900  |

|   |             |             |             |   |             |             |             |
|---|-------------|-------------|-------------|---|-------------|-------------|-------------|
| H | -3.18611300 | -3.19119500 | 2.77752600  | H | -2.21214300 | 1.99913600  | 1.33335300  |
| H | -5.91463400 | -0.43619800 | 0.03091300  | H | -3.02418700 | 1.49210000  | -0.01965600 |
| H | -5.73620600 | -0.36572200 | -1.72726300 | H | 0.33570500  | -2.20705400 | -1.33333100 |
| H | -3.59320200 | 0.02165800  | -2.57020700 | C | 2.85754000  | -3.58379500 | -1.39461200 |
| H | -2.18475900 | -0.81034900 | -1.87183600 | H | 1.97831000  | -4.11310900 | -1.76903600 |
| H | -3.49657100 | -1.75430300 | -2.62602200 | H | 3.59652400  | -3.48707200 | -2.19436000 |
| H | -5.86800500 | -1.94539200 | -0.94134900 | H | 3.29941200  | -4.14542500 | -0.56752700 |
| H | -2.59543900 | 4.02219700  | 0.14544000  | H | -5.12179800 | -2.06485000 | 1.22191400  |
| H | -2.19122000 | 3.20078400  | -1.37925000 | O | 2.67701500  | 2.11669300  | 0.75975400  |
| H | -0.21894100 | 4.56366400  | -0.69103200 | N | 6.54562700  | -0.51438600 | 0.79496100  |
| H | -0.23086400 | 3.82994700  | 0.92074800  | H | 7.03457700  | -1.37279100 | 0.57002300  |
| H | 1.31978600  | 2.50439600  | -0.09563700 | H | 7.06227900  | 0.23299500  | 1.23953700  |
| H | 0.55438300  | 2.54424800  | -1.61297400 | H | 5.02497200  | 1.53157000  | 1.19244400  |

**Table S2.** Vibrational Frequencies ( $\text{cm}^{-1}$ ) for Optimized Structures**9MeA**

|           |           |           |           |           |           |
|-----------|-----------|-----------|-----------|-----------|-----------|
| 55.7630   | 116.0871  | 197.1701  | 216.1324  | 254.4594  | 307.5287  |
| 314.0644  | 526.7769  | 530.6223  | 533.0809  | 550.9364  | 575.2099  |
| 580.6740  | 664.0541  | 694.8370  | 718.6144  | 735.7323  | 832.7531  |
| 867.8813  | 881.5982  | 972.2650  | 988.6710  | 1050.6523 | 1079.5696 |
| 1163.4758 | 1206.4470 | 1250.3205 | 1267.7889 | 1327.4287 | 1343.2388 |
| 1344.6030 | 1399.6414 | 1424.7871 | 1466.9948 | 1486.5781 | 1520.9805 |
| 1527.5337 | 1532.7249 | 1595.2245 | 1625.2770 | 1669.9217 | 3060.1424 |
| 3144.6709 | 3179.2760 | 3239.9406 | 3296.0840 | 3620.8109 | 3774.0718 |

**9MeG**

|           |           |           |           |           |           |
|-----------|-----------|-----------|-----------|-----------|-----------|
| 57.6420   | 109.0291  | 149.5515  | 184.4816  | 214.1818  | 252.2863  |
| 295.0139  | 326.1955  | 371.1574  | 374.8889  | 482.1665  | 510.9357  |
| 511.9497  | 597.5805  | 635.1049  | 664.0961  | 664.3341  | 721.1178  |
| 726.4458  | 734.5391  | 804.3870  | 833.1466  | 838.2566  | 1008.3058 |
| 1049.1676 | 1051.1918 | 1095.2814 | 1124.1758 | 1163.5391 | 1236.1969 |
| 1294.0953 | 1333.1846 | 1353.6301 | 1385.4976 | 1418.6439 | 1469.2605 |
| 1500.0990 | 1524.1684 | 1527.1138 | 1539.3740 | 1578.1702 | 1630.5271 |
| 1672.7826 | 1728.8008 | 3059.9465 | 3142.9974 | 3181.0811 | 3298.0033 |
| 3599.4121 | 3640.0001 | 3787.7257 |           |           |           |

**PT-AMD-Cl**

|           |           |           |           |           |           |
|-----------|-----------|-----------|-----------|-----------|-----------|
| 27.6042   | 41.0543   | 48.6741   | 65.3163   | 87.8270   | 100.8730  |
| 121.9173  | 125.0702  | 156.2233  | 169.0845  | 174.9748  | 198.6770  |
| 211.9978  | 234.2373  | 269.5009  | 275.1356  | 300.0904  | 316.3019  |
| 344.5367  | 402.4788  | 440.4815  | 454.2626  | 499.5160  | 517.9742  |
| 566.3795  | 663.6362  | 694.9318  | 727.0163  | 740.1606  | 770.1097  |
| 785.9248  | 823.5492  | 870.9266  | 883.2530  | 940.9100  | 1000.4634 |
| 1017.0549 | 1025.6005 | 1071.4606 | 1081.4800 | 1094.0083 | 1114.5260 |
| 1116.2414 | 1126.1986 | 1163.9395 | 1173.8779 | 1198.1495 | 1204.8406 |
| 1264.6299 | 1291.7093 | 1299.0659 | 1321.1272 | 1347.1231 | 1368.5751 |
| 1388.4787 | 1415.0378 | 1433.4958 | 1441.7858 | 1480.9806 | 1489.1860 |
| 1510.0074 | 1515.9591 | 1519.3953 | 1522.7735 | 1524.9473 | 1528.9688 |
| 1531.4128 | 1534.2052 | 1539.0254 | 1559.9025 | 1627.4789 | 1691.2093 |
| 1696.8850 | 3036.1639 | 3051.9454 | 3061.9080 | 3087.2669 | 3093.5169 |
| 3105.8179 | 3113.3462 | 3132.6138 | 3136.2915 | 3148.6316 | 3152.0556 |
| 3164.6800 | 3166.8454 | 3185.0795 | 3223.1669 | 3452.9968 | 3456.1743 |
| 3533.6085 | 3544.6703 | 3571.3335 |           |           |           |

**PT-AMD-AQ**

|           |           |           |           |           |           |
|-----------|-----------|-----------|-----------|-----------|-----------|
| 26.2570   | 46.1271   | 57.2744   | 69.3964   | 102.4970  | 109.7590  |
| 118.4034  | 138.8381  | 159.6285  | 163.8708  | 170.2511  | 182.0369  |
| 199.2387  | 211.9160  | 222.8428  | 273.7727  | 278.8082  | 313.4072  |
| 327.8827  | 390.0037  | 416.0328  | 441.0968  | 455.2464  | 470.8068  |
| 506.6788  | 541.4310  | 583.4158  | 645.9982  | 695.3181  | 710.8633  |
| 733.5406  | 757.4819  | 764.8731  | 816.7875  | 820.2711  | 866.0359  |
| 879.4625  | 935.2533  | 1001.8218 | 1020.0139 | 1024.3286 | 1072.1715 |
| 1072.6648 | 1090.4754 | 1106.9551 | 1120.2287 | 1130.2546 | 1173.8152 |



|           |           |           |           |           |           |
|-----------|-----------|-----------|-----------|-----------|-----------|
| 1203.7179 | 1205.6113 | 1250.0786 | 1250.4000 | 1284.1864 | 1301.2484 |
| 1338.6025 | 1351.7905 | 1357.7428 | 1391.4396 | 1419.0733 | 1442.7199 |
| 1443.7056 | 1479.2852 | 1489.8760 | 1495.4116 | 1511.9153 | 1516.9399 |
| 1521.6479 | 1524.7833 | 1525.3410 | 1528.7444 | 1530.5298 | 1538.2051 |
| 1552.0183 | 1632.7232 | 1663.6077 | 1686.5665 | 1694.1506 | 3045.3651 |
| 3049.5742 | 3076.0262 | 3085.5996 | 3101.5094 | 3104.4455 | 3125.3849 |
| 3127.6290 | 3146.5753 | 3157.5026 | 3164.8915 | 3171.4671 | 3179.1798 |
| 3197.3553 | 3229.9337 | 3432.3460 | 3440.7671 | 3511.2833 | 3522.8742 |
| 3562.6521 | 3701.7110 | 3833.5025 |           |           |           |

PT-AMD-TS-A

|           |           |           |           |           |           |
|-----------|-----------|-----------|-----------|-----------|-----------|
| -139.2871 | 20.4616   | 31.9556   | 33.8901   | 43.9737   | 46.9437   |
| 57.6224   | 71.2897   | 84.6311   | 88.0432   | 94.9480   | 104.9734  |
| 114.3086  | 126.4854  | 129.7696  | 142.1697  | 152.7819  | 167.8861  |
| 173.9203  | 189.3398  | 189.9918  | 201.4274  | 208.6729  | 224.1009  |
| 226.0054  | 237.3087  | 270.3929  | 278.9988  | 292.0203  | 312.4161  |
| 320.1734  | 326.1866  | 339.7763  | 389.1368  | 419.3307  | 427.1318  |
| 451.6849  | 458.9389  | 487.8122  | 507.2127  | 519.5939  | 534.1661  |
| 538.4755  | 571.6377  | 576.1174  | 584.2785  | 648.4249  | 655.0348  |
| 672.6408  | 707.4929  | 716.4073  | 733.1971  | 735.4208  | 754.7336  |
| 762.5251  | 792.2276  | 811.8660  | 828.9811  | 832.6432  | 874.7737  |
| 881.5003  | 882.3361  | 903.7017  | 939.1440  | 986.6885  | 1006.1808 |
| 1009.9072 | 1019.3342 | 1026.0665 | 1061.2244 | 1073.6112 | 1075.6825 |
| 1090.0364 | 1093.8343 | 1113.2893 | 1121.3985 | 1140.1067 | 1162.8909 |
| 1173.3449 | 1187.4532 | 1194.9763 | 1204.4381 | 1225.4228 | 1247.3841 |
| 1253.2857 | 1259.6966 | 1292.1530 | 1309.1778 | 1311.6995 | 1326.4041 |
| 1333.0473 | 1351.3098 | 1354.3465 | 1357.2258 | 1377.3864 | 1381.8939 |
| 1394.1369 | 1418.9490 | 1442.6617 | 1443.0693 | 1460.8496 | 1470.5811 |
| 1479.9790 | 1487.2971 | 1501.0407 | 1515.2471 | 1515.4150 | 1518.4321 |
| 1519.3482 | 1525.2999 | 1525.7845 | 1525.8993 | 1529.7036 | 1530.9897 |
| 1534.3444 | 1537.6192 | 1550.5568 | 1594.5465 | 1612.7754 | 1615.3057 |
| 1623.7705 | 1662.5713 | 1692.6947 | 1700.2100 | 3040.7110 | 3063.3075 |
| 3073.4188 | 3080.9226 | 3090.4429 | 3095.2597 | 3100.9484 | 3118.0682 |
| 3138.1281 | 3152.8092 | 3157.3113 | 3158.5285 | 3167.8799 | 3174.0312 |
| 3178.5975 | 3194.8015 | 3198.9538 | 3230.6721 | 3269.4227 | 3317.3114 |
| 3366.0451 | 3449.5536 | 3518.1122 | 3534.6172 | 3547.3362 | 3549.6871 |
| 3670.1686 | 3693.4938 | 3824.0144 |           |           |           |

PT-AMD-TS-G

|           |           |           |           |           |           |
|-----------|-----------|-----------|-----------|-----------|-----------|
| -146.1048 | 20.4564   | 26.6755   | 36.4316   | 56.9585   | 59.0483   |
| 62.6319   | 73.0284   | 80.1978   | 85.2846   | 92.5875   | 105.3277  |
| 115.7067  | 124.5498  | 130.7484  | 138.5864  | 152.0322  | 156.8630  |
| 167.2224  | 185.1506  | 197.5282  | 201.9650  | 204.7620  | 213.8807  |
| 221.0098  | 227.6368  | 269.9968  | 271.1361  | 279.8711  | 306.4055  |
| 316.8177  | 319.4825  | 350.7814  | 367.5826  | 384.8439  | 391.5377  |
| 407.3355  | 438.2427  | 452.4964  | 460.5936  | 486.1448  | 503.6036  |
| 508.7070  | 525.5337  | 527.3979  | 571.3898  | 613.8652  | 635.6536  |
| 644.1990  | 671.7634  | 673.6182  | 678.4433  | 718.5031  | 721.3915  |
| 732.9793  | 738.8235  | 749.9830  | 760.2703  | 792.2856  | 815.4454  |
| 830.3130  | 846.1196  | 870.5801  | 875.4881  | 879.5800  | 945.1084  |
| 979.9185  | 1004.8582 | 1010.1001 | 1011.1695 | 1023.7809 | 1055.6143 |
| 1073.0035 | 1078.8268 | 1081.9290 | 1093.6287 | 1100.8699 | 1109.1787 |

|           |           |           |           |           |           |
|-----------|-----------|-----------|-----------|-----------|-----------|
| 1121.9168 | 1122.4109 | 1163.9686 | 1169.4100 | 1171.4155 | 1179.9180 |
| 1210.7851 | 1215.5010 | 1238.2250 | 1266.6970 | 1293.2250 | 1299.1171 |
| 1305.5955 | 1328.3085 | 1335.3400 | 1347.5224 | 1363.3935 | 1372.1961 |
| 1378.3112 | 1403.8490 | 1415.7111 | 1417.8020 | 1439.1963 | 1442.2618 |
| 1463.8494 | 1482.5034 | 1490.6026 | 1500.5173 | 1503.9836 | 1510.2967 |
| 1515.6263 | 1516.7730 | 1521.1877 | 1523.7909 | 1524.7226 | 1525.2762 |
| 1529.1256 | 1532.1724 | 1536.4900 | 1546.7807 | 1552.9813 | 1583.0788 |
| 1591.4492 | 1627.7582 | 1646.4109 | 1682.8903 | 1692.5396 | 1694.8748 |
| 1701.5752 | 3057.1712 | 3060.1139 | 3066.5995 | 3077.7562 | 3084.6667 |
| 3093.5820 | 3098.0438 | 3123.8722 | 3142.1363 | 3143.1176 | 3146.7556 |
| 3155.2572 | 3164.1625 | 3171.0999 | 3183.5736 | 3193.6870 | 3194.8710 |
| 3218.8171 | 3303.4468 | 3312.4691 | 3442.1652 | 3453.8662 | 3524.9121 |
| 3540.6417 | 3584.4146 | 3612.0584 | 3659.9837 | 3751.8520 | 3822.0776 |

PT-AMD-A

|           |           |           |           |           |           |
|-----------|-----------|-----------|-----------|-----------|-----------|
| 23.0335   | 29.1655   | 31.9215   | 55.3376   | 61.9122   | 65.7256   |
| 65.8699   | 83.1321   | 105.1725  | 106.9359  | 115.5380  | 130.4339  |
| 153.6154  | 161.1877  | 168.1072  | 186.7619  | 187.9438  | 202.0914  |
| 210.8731  | 217.3641  | 228.7986  | 247.4440  | 268.1404  | 278.5007  |
| 285.2912  | 307.5376  | 324.0097  | 347.3615  | 358.0528  | 393.3105  |
| 436.1628  | 453.8919  | 482.4604  | 508.2227  | 516.7855  | 533.1101  |
| 549.7769  | 567.4331  | 570.1829  | 588.6856  | 644.2899  | 653.7642  |
| 669.1581  | 704.6759  | 714.8445  | 716.3876  | 736.0913  | 740.7544  |
| 768.4584  | 782.6473  | 799.4270  | 828.0671  | 829.0348  | 869.2381  |
| 879.9983  | 890.5288  | 908.8805  | 941.4252  | 990.2672  | 998.2683  |
| 1007.3292 | 1012.9175 | 1022.2594 | 1072.8337 | 1076.4178 | 1087.7846 |
| 1092.6372 | 1101.0076 | 1113.7718 | 1122.4927 | 1124.0924 | 1164.0893 |
| 1173.7179 | 1189.0208 | 1194.6130 | 1207.9549 | 1228.7409 | 1252.6272 |
| 1257.5592 | 1268.3323 | 1290.3239 | 1301.8265 | 1303.5117 | 1332.9729 |
| 1341.7725 | 1350.5706 | 1359.3874 | 1365.1643 | 1389.6453 | 1397.9231 |
| 1418.1217 | 1419.8255 | 1440.8736 | 1443.9447 | 1463.8563 | 1479.1358 |
| 1482.0655 | 1491.8125 | 1499.5981 | 1504.8708 | 1516.6244 | 1520.4454 |
| 1523.4102 | 1524.5476 | 1526.6311 | 1526.7671 | 1529.0677 | 1532.6503 |
| 1538.2482 | 1554.2772 | 1560.4468 | 1603.8427 | 1616.2997 | 1631.6031 |
| 1662.4266 | 1692.7032 | 1695.3704 | 3046.2264 | 3062.5849 | 3073.0366 |
| 3086.7540 | 3088.4679 | 3096.5554 | 3099.3815 | 3126.0549 | 3132.7667 |
| 3152.3524 | 3155.5149 | 3157.8937 | 3165.8698 | 3172.0959 | 3191.0827 |
| 3195.5942 | 3200.5979 | 3228.7670 | 3269.9317 | 3314.7648 | 3444.7075 |
| 3445.7330 | 3526.3057 | 3526.8610 | 3526.9470 | 3560.8337 | 3704.0865 |

PT-AMD-G

|          |           |           |           |           |           |
|----------|-----------|-----------|-----------|-----------|-----------|
| 20.4678  | 30.2242   | 39.8510   | 50.7163   | 56.5661   | 57.3468   |
| 67.4847  | 85.6676   | 96.3343   | 99.6249   | 109.0919  | 124.1720  |
| 143.7147 | 153.4242  | 166.8449  | 180.7260  | 188.3270  | 198.7514  |
| 207.4302 | 208.8815  | 216.2912  | 227.2064  | 232.0805  | 271.8387  |
| 278.0054 | 290.0730  | 313.8636  | 319.6551  | 349.0287  | 384.3191  |
| 390.8948 | 402.5124  | 421.9625  | 436.7686  | 451.5627  | 502.8252  |
| 505.9571 | 518.0255  | 533.2909  | 567.9941  | 610.6179  | 641.2515  |
| 649.7942 | 668.4987  | 674.8964  | 677.5874  | 723.2832  | 724.7029  |
| 734.9301 | 739.0065  | 739.8691  | 761.5285  | 791.3835  | 815.0176  |
| 826.1349 | 861.3136  | 870.9128  | 881.9508  | 886.5482  | 899.0237  |
| 944.9270 | 1009.3473 | 1012.0085 | 1013.6891 | 1022.1294 | 1072.6052 |

|           |           |           |           |           |           |
|-----------|-----------|-----------|-----------|-----------|-----------|
| 1075.8900 | 1078.1981 | 1090.0220 | 1093.7398 | 1104.1541 | 1113.9702 |
| 1122.3834 | 1125.9293 | 1164.1222 | 1172.7216 | 1174.6560 | 1183.9890 |
| 1209.2171 | 1222.1515 | 1238.9641 | 1262.4260 | 1291.3443 | 1303.8077 |
| 1311.9979 | 1331.6140 | 1348.7959 | 1351.4257 | 1357.5687 | 1379.7993 |
| 1386.4875 | 1400.0872 | 1418.4225 | 1424.9634 | 1440.7107 | 1441.8904 |
| 1477.0564 | 1480.5361 | 1488.9293 | 1501.7731 | 1506.7219 | 1508.8933 |
| 1515.1265 | 1520.8564 | 1524.1555 | 1525.2345 | 1525.2703 | 1525.7677 |
| 1527.7429 | 1531.4116 | 1535.7308 | 1551.9785 | 1562.6494 | 1596.9953 |
| 1628.5572 | 1646.0668 | 1684.9997 | 1689.6869 | 1694.6255 | 1702.2007 |
| 3051.5718 | 3059.7954 | 3068.4008 | 3087.3130 | 3087.6044 | 3095.2966 |
| 3099.2600 | 3130.4914 | 3132.8720 | 3144.9349 | 3154.7881 | 3156.9950 |
| 3161.8963 | 3171.7923 | 3188.3392 | 3193.1354 | 3199.2915 | 3223.4885 |
| 3319.8116 | 3446.1082 | 3446.4819 | 3446.6865 | 3529.4280 | 3532.3384 |
| 3579.6089 | 3607.8118 | 3746.5814 |           |           |           |

PT-TU-CI

|           |           |           |           |           |           |
|-----------|-----------|-----------|-----------|-----------|-----------|
| 10.1621   | 24.6888   | 55.4761   | 72.1849   | 86.0412   | 103.6306  |
| 107.3549  | 128.4249  | 138.6037  | 146.9388  | 159.4784  | 178.6087  |
| 210.3045  | 244.8015  | 265.6104  | 282.9753  | 292.3865  | 300.1383  |
| 327.7757  | 332.6519  | 397.4435  | 438.8839  | 451.4811  | 516.3234  |
| 523.1435  | 553.8124  | 563.4183  | 614.1126  | 691.3771  | 731.2441  |
| 774.4806  | 870.3421  | 883.3510  | 889.4259  | 1000.5151 | 1016.9985 |
| 1046.5050 | 1073.7941 | 1080.9183 | 1116.6769 | 1122.2565 | 1151.5896 |
| 1156.0600 | 1166.3845 | 1179.7905 | 1200.1042 | 1208.2402 | 1276.5587 |
| 1297.2798 | 1320.5953 | 1345.6768 | 1403.0377 | 1415.8989 | 1435.2012 |
| 1439.0106 | 1475.3536 | 1494.9260 | 1500.9661 | 1508.9834 | 1515.7919 |
| 1519.2442 | 1520.3898 | 1526.6549 | 1529.4861 | 1536.7494 | 1554.5659 |
| 1637.0168 | 1692.8512 | 1696.7552 | 3043.1419 | 3066.8385 | 3074.4935 |
| 3087.1870 | 3093.6067 | 3125.1733 | 3148.7156 | 3151.1838 | 3165.1654 |
| 3168.9397 | 3186.7601 | 3195.6974 | 3216.6576 | 3453.9321 | 3457.0838 |
| 3539.2365 | 3541.0603 | 3620.3169 |           |           |           |

PT-TU-AQ

|           |           |           |           |           |           |
|-----------|-----------|-----------|-----------|-----------|-----------|
| 31.8179   | 48.1091   | 79.2803   | 90.8713   | 99.4247   | 110.9065  |
| 115.7433  | 141.0023  | 149.3589  | 161.2030  | 170.3116  | 204.0040  |
| 212.8444  | 236.0696  | 263.7296  | 283.0806  | 314.4665  | 346.3830  |
| 358.5317  | 374.3353  | 422.4830  | 447.2509  | 448.8203  | 471.2881  |
| 508.4119  | 535.3048  | 582.3764  | 601.0289  | 670.2490  | 744.8646  |
| 806.9395  | 830.9342  | 859.1366  | 869.9216  | 879.6853  | 913.4658  |
| 980.8674  | 1004.1907 | 1027.8594 | 1036.1130 | 1060.9269 | 1074.3782 |
| 1111.6022 | 1118.2375 | 1139.7296 | 1155.6448 | 1170.1018 | 1199.8351 |
| 1202.3034 | 1214.8947 | 1257.0372 | 1302.4337 | 1307.9535 | 1338.8614 |
| 1353.8703 | 1420.0931 | 1435.0802 | 1445.5258 | 1476.9847 | 1487.0740 |
| 1491.0221 | 1509.8126 | 1513.9652 | 1518.7221 | 1521.9788 | 1522.4766 |
| 1527.6147 | 1533.7744 | 1540.1228 | 1604.9263 | 1666.3694 | 1691.7583 |
| 1694.7119 | 2903.4071 | 3069.4776 | 3079.3742 | 3083.2158 | 3100.7790 |
| 3103.9130 | 3164.0037 | 3170.0331 | 3176.9522 | 3178.2855 | 3185.0755 |
| 3194.5323 | 3209.0052 | 3212.1301 | 3432.2476 | 3439.5633 | 3510.1156 |
| 3524.5913 | 3528.2416 | 3790.5501 |           |           |           |

PT-TU-TS-A

|           |         |         |         |         |         |
|-----------|---------|---------|---------|---------|---------|
| -151.8150 | 23.8058 | 26.3916 | 35.8684 | 44.5076 | 53.9317 |
|-----------|---------|---------|---------|---------|---------|

|           |           |           |           |           |           |
|-----------|-----------|-----------|-----------|-----------|-----------|
| 56.3456   | 67.8632   | 81.9362   | 91.9686   | 98.9229   | 101.2027  |
| 105.7205  | 114.7131  | 120.9060  | 141.4659  | 155.1495  | 164.3216  |
| 172.7783  | 195.1331  | 199.2030  | 210.6914  | 214.0014  | 225.7874  |
| 265.4498  | 268.6308  | 273.2631  | 292.9755  | 298.4516  | 306.3515  |
| 325.5885  | 349.5028  | 375.6602  | 393.5540  | 412.9125  | 439.4859  |
| 448.4332  | 495.6978  | 524.7011  | 529.0299  | 535.2725  | 542.6670  |
| 564.8193  | 566.4920  | 574.9698  | 586.7296  | 609.6849  | 650.4355  |
| 668.5163  | 693.1406  | 705.4725  | 733.0865  | 736.3835  | 751.0538  |
| 785.7918  | 833.4891  | 866.7234  | 876.6559  | 880.1076  | 884.6381  |
| 892.5358  | 953.5283  | 984.6520  | 1003.0689 | 1006.7960 | 1023.4292 |
| 1033.0641 | 1070.8194 | 1074.6409 | 1079.7617 | 1090.3749 | 1118.3499 |
| 1121.3436 | 1138.9063 | 1149.7153 | 1152.6790 | 1163.8970 | 1175.1425 |
| 1180.5924 | 1200.7331 | 1204.8147 | 1213.6528 | 1247.3489 | 1251.8470 |
| 1265.7552 | 1294.2605 | 1304.3207 | 1319.1204 | 1325.5330 | 1344.7985 |
| 1351.4711 | 1380.6981 | 1390.7077 | 1395.5967 | 1415.9007 | 1435.4731 |
| 1437.6463 | 1463.5709 | 1471.5143 | 1482.2916 | 1499.5779 | 1501.5622 |
| 1505.3317 | 1508.1155 | 1519.0746 | 1522.6567 | 1523.9002 | 1526.8615 |
| 1528.2672 | 1531.9275 | 1537.0481 | 1538.8698 | 1552.5548 | 1591.0687 |
| 1619.0973 | 1622.8958 | 1675.6506 | 1690.6323 | 1695.4584 | 1707.5022 |
| 2795.1093 | 3046.4814 | 3055.9529 | 3078.7656 | 3084.7445 | 3093.4770 |
| 3098.0567 | 3132.3734 | 3138.1437 | 3155.0328 | 3171.4817 | 3172.9532 |
| 3185.5474 | 3188.8306 | 3194.0979 | 3195.3130 | 3218.2105 | 3272.7977 |
| 3294.8051 | 3448.5690 | 3449.2809 | 3470.5019 | 3530.9243 | 3531.3761 |
| 3593.2814 | 3605.1781 | 3761.9770 |           |           |           |

PT-TU-TS-G

|           |           |           |           |           |           |
|-----------|-----------|-----------|-----------|-----------|-----------|
| -149.3696 | 24.6249   | 26.0023   | 30.8374   | 35.5932   | 40.2264   |
| 49.4326   | 70.0333   | 80.0498   | 81.3640   | 91.5566   | 101.8038  |
| 115.0407  | 124.3700  | 132.2819  | 139.1068  | 143.5291  | 155.3477  |
| 163.7922  | 178.3395  | 189.5631  | 204.0856  | 212.2421  | 215.6618  |
| 219.4321  | 236.7933  | 250.6704  | 269.8759  | 281.1948  | 305.8630  |
| 315.0354  | 344.2734  | 357.7808  | 364.5790  | 373.7868  | 387.8587  |
| 405.2948  | 406.3730  | 438.6987  | 449.9195  | 495.0044  | 522.5996  |
| 526.6775  | 529.7318  | 568.4660  | 576.2448  | 609.4044  | 611.1806  |
| 628.6975  | 641.0764  | 643.7142  | 675.1712  | 677.9569  | 681.5819  |
| 723.0881  | 732.2883  | 742.5313  | 764.8444  | 806.0089  | 816.4657  |
| 842.2475  | 856.0475  | 870.7915  | 878.2091  | 883.0547  | 893.2635  |
| 1006.7566 | 1011.2401 | 1014.4493 | 1039.6347 | 1054.4583 | 1077.3898 |
| 1077.5101 | 1079.5264 | 1101.5653 | 1119.3416 | 1121.5943 | 1146.2463 |
| 1161.7587 | 1164.3450 | 1172.7943 | 1189.3548 | 1198.7220 | 1206.6895 |
| 1236.0947 | 1251.6382 | 1266.7705 | 1295.4465 | 1314.7986 | 1326.2134 |
| 1343.4940 | 1344.1652 | 1365.5432 | 1381.0081 | 1388.1990 | 1409.0457 |
| 1412.9612 | 1433.1839 | 1434.4369 | 1466.9480 | 1479.2705 | 1491.3097 |
| 1499.4085 | 1504.3237 | 1504.9637 | 1514.6177 | 1517.1800 | 1518.2094 |
| 1520.8516 | 1525.4792 | 1529.4163 | 1534.8045 | 1536.8915 | 1545.8295 |
| 1550.9922 | 1593.0106 | 1614.4785 | 1629.6103 | 1649.8406 | 1661.2962 |
| 1691.2768 | 1696.5448 | 1718.9660 | 3048.0966 | 3066.2220 | 3070.0321 |
| 3084.9313 | 3090.7745 | 3096.2446 | 3136.2263 | 3153.1660 | 3154.8343 |
| 3157.0643 | 3169.3328 | 3182.1594 | 3183.3053 | 3194.4844 | 3196.4271 |
| 3209.5199 | 3251.3386 | 3314.5634 | 3388.4222 | 3452.9116 | 3485.1272 |
| 3537.5825 | 3580.4866 | 3610.1757 | 3610.4127 | 3749.3395 | 3786.4781 |

**PT-TU-A**

|           |           |           |           |           |           |
|-----------|-----------|-----------|-----------|-----------|-----------|
| 16.6820   | 30.2962   | 35.1534   | 41.4871   | 52.4127   | 59.9169   |
| 80.2791   | 90.4137   | 101.4027  | 103.1047  | 111.5643  | 115.1723  |
| 129.3705  | 159.7506  | 163.2891  | 165.6557  | 185.4185  | 197.9855  |
| 207.7228  | 220.7450  | 229.6967  | 248.7228  | 262.4883  | 272.4220  |
| 278.4981  | 294.3798  | 306.1224  | 346.8076  | 351.5381  | 364.1806  |
| 397.0923  | 433.1730  | 444.2073  | 488.1927  | 528.8481  | 531.6246  |
| 535.8916  | 551.6278  | 567.1222  | 577.8187  | 583.4000  | 595.9658  |
| 613.5574  | 650.7837  | 672.8370  | 704.6574  | 713.8269  | 766.4566  |
| 774.3354  | 821.3971  | 837.4427  | 872.1166  | 875.6713  | 877.8389  |
| 886.5986  | 901.1818  | 912.7514  | 987.0545  | 1006.8645 | 1022.5984 |
| 1028.6112 | 1031.6160 | 1069.9299 | 1079.0448 | 1092.6598 | 1101.7231 |
| 1118.0426 | 1132.1697 | 1137.7308 | 1150.8533 | 1164.0248 | 1170.9385 |
| 1198.9679 | 1200.5264 | 1202.8793 | 1252.0555 | 1256.3944 | 1265.1445 |
| 1275.4671 | 1306.3188 | 1322.1536 | 1328.9528 | 1339.2356 | 1354.9045 |
| 1362.2869 | 1388.0968 | 1393.2508 | 1413.1246 | 1420.0368 | 1428.0384 |
| 1440.7186 | 1463.2522 | 1476.6682 | 1477.6603 | 1497.9885 | 1499.8997 |
| 1502.1372 | 1507.6190 | 1518.5441 | 1521.4727 | 1523.0886 | 1524.9598 |
| 1526.3762 | 1526.5626 | 1535.7230 | 1552.6933 | 1558.9969 | 1601.7323 |
| 1608.5203 | 1617.6786 | 1673.6465 | 1697.6372 | 1709.6584 | 3045.9250 |
| 3060.3345 | 3080.5344 | 3089.3088 | 3093.0063 | 3097.4391 | 3140.0883 |
| 3145.0420 | 3154.3881 | 3170.0970 | 3176.1155 | 3183.1423 | 3188.3599 |
| 3191.7631 | 3198.6565 | 3202.2242 | 3203.3768 | 3274.0806 | 3331.5532 |
| 3441.3109 | 3498.8285 | 3510.5815 | 3521.7666 | 3597.9358 | 3635.1398 |

**PT-TU-G**

|           |           |           |           |           |           |
|-----------|-----------|-----------|-----------|-----------|-----------|
| 18.7121   | 29.2751   | 35.4678   | 49.5506   | 58.0338   | 65.5764   |
| 86.6476   | 88.0379   | 99.3498   | 99.7007   | 113.5725  | 123.9357  |
| 132.7600  | 146.5874  | 162.3666  | 167.8554  | 184.1648  | 197.1917  |
| 202.8662  | 207.7216  | 218.5151  | 229.1661  | 233.4770  | 262.9032  |
| 281.1318  | 288.0240  | 294.6595  | 321.0428  | 348.0233  | 369.8293  |
| 383.1083  | 397.4034  | 409.2819  | 422.7867  | 445.7171  | 453.5889  |
| 507.2922  | 531.3146  | 539.1255  | 541.6452  | 578.1336  | 584.6518  |
| 613.1589  | 620.5650  | 639.5242  | 649.4888  | 673.9465  | 680.9033  |
| 705.3209  | 724.1936  | 733.9447  | 765.4837  | 778.7845  | 817.7667  |
| 856.4412  | 874.7964  | 877.5484  | 878.8134  | 884.8336  | 893.0633  |
| 1011.0443 | 1014.9493 | 1030.8580 | 1037.3681 | 1071.9411 | 1077.6871 |
| 1083.7942 | 1093.8810 | 1107.4232 | 1119.1204 | 1133.7886 | 1143.3260 |
| 1151.4351 | 1164.8637 | 1171.9811 | 1190.0337 | 1200.7853 | 1202.7600 |
| 1246.6665 | 1258.5371 | 1289.0501 | 1312.4250 | 1327.4804 | 1352.1535 |
| 1354.5408 | 1363.6220 | 1383.6074 | 1387.4574 | 1391.2190 | 1420.7179 |
| 1423.7029 | 1427.5601 | 1448.4412 | 1476.1369 | 1477.1330 | 1498.1383 |
| 1502.5985 | 1502.8237 | 1505.2848 | 1505.8724 | 1519.6788 | 1521.1594 |
| 1521.5973 | 1522.5532 | 1525.1935 | 1527.2684 | 1536.0029 | 1552.2300 |
| 1565.8725 | 1597.5869 | 1606.9491 | 1650.0451 | 1676.5433 | 1696.0890 |
| 1699.2796 | 1727.9814 | 2975.6694 | 3044.7810 | 3060.1453 | 3079.1033 |
| 3088.2187 | 3092.7478 | 3096.8058 | 3138.0382 | 3144.7888 | 3153.4530 |
| 3169.0500 | 3174.0122 | 3187.3563 | 3188.8730 | 3196.4651 | 3200.6526 |
| 3205.7117 | 3340.9623 | 3442.7980 | 3498.9602 | 3527.8181 | 3578.0304 |
| 3603.4068 | 3607.8238 | 3746.4666 |           |           |           |

---

**Table S3.** Computed Absolute Energies of Optimized Structures (kcal mol<sup>-1</sup>)

|          | PT-Cl   | PT-AQ   | PT-TS-A | PT-TS-G | PT-A    | PT-G    |
|----------|---------|---------|---------|---------|---------|---------|
| AMD (NH) | -396337 | -434783 | -752543 | -799777 | -704631 | -751854 |
| TU (S)   | -378027 | -416466 | -734238 | -781466 | -686310 | -733541 |

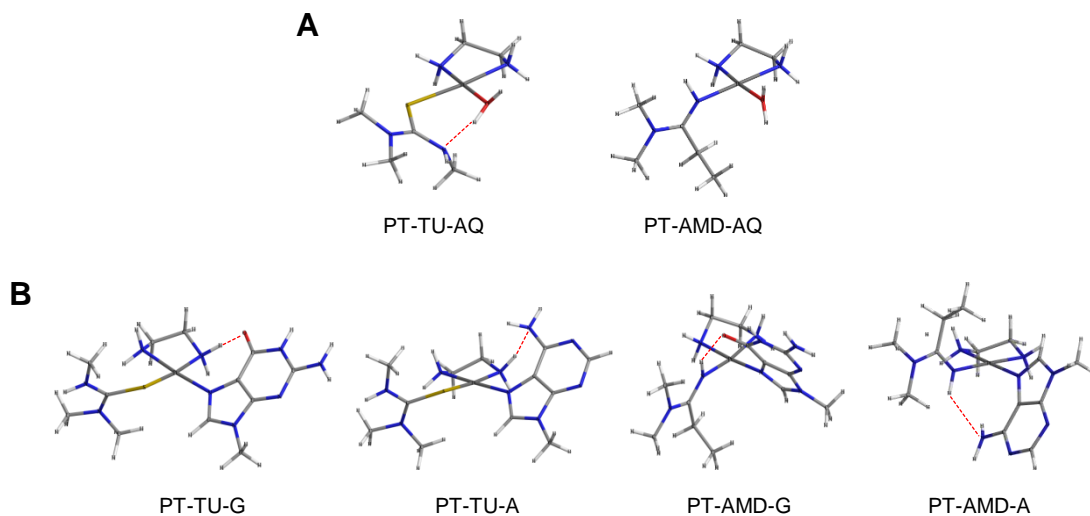

**Figure S1.** Results of the DFT computations. **(A)** Optimized aqua intermediates. (The chloro precursors are not shown.) **(B)** Optimized platinum–nucleobase adducts. Hydrogen bonding interactions are highlighted with dashed red lines.

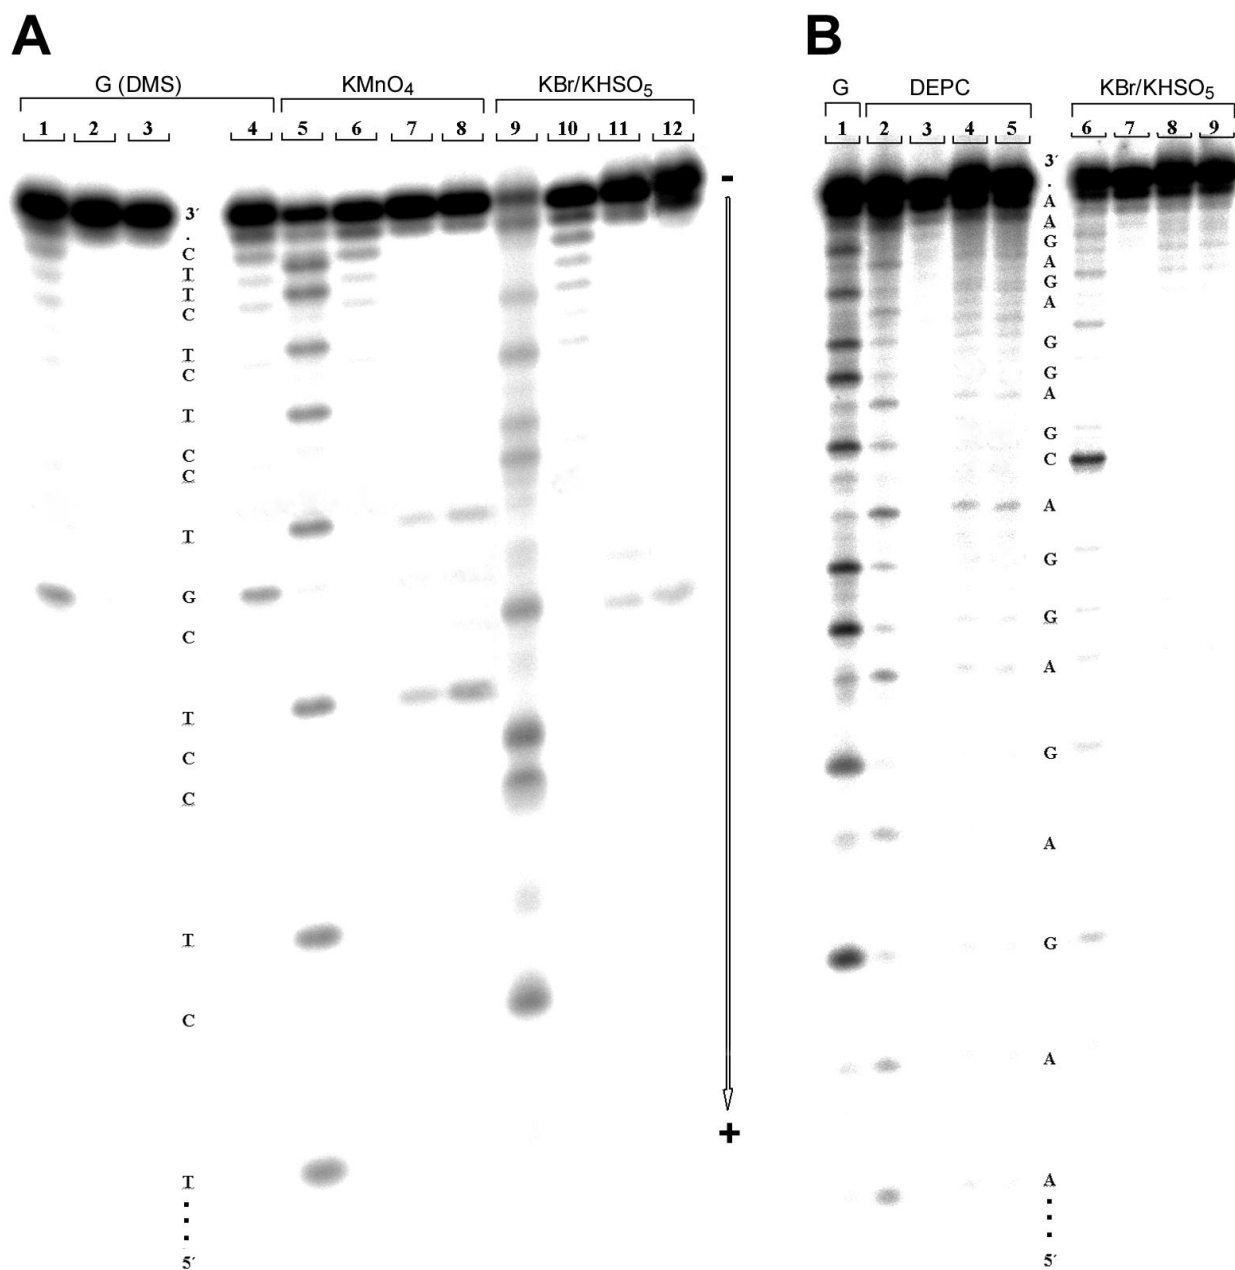

**Figure S2.** Chemical probes of DNA conformation. Piperidine-induced specific-strand cleavage at  $\text{KMnO}_4$ -modified,  $\text{KBr/KHSO}_5$ -modified, and DEPC-modified bases in the 22-bp duplex (shown in Figure 6) unplatinated or containing a single, site-specific adduct of **1** or **2** at the central G residue in the top strand. The oligomers were 5'-end labeled on either the top (A) or bottom strand (B).

Lanes in Figure S2A (the top strand 5'-end labeled): 1, 4: a Maxam–Gilbert specific reaction for G residues (DMS) in the unplatinated top strand; 2, 3: a Maxam–Gilbert specific reaction for G residues in the strand containing adduct of **1** or **2**, respectively; 5, 9: the unplatinated single strand; 6, 10: the unplatinated duplex; 7, 11: the duplex containing a unique adduct of **1**; 8, 12: the duplex containing a unique adduct of **2**.

Lanes in Figure S2B (the bottom strand 5'-end labeled): 1: a Maxam–Gilbert specific reaction for G residues (DMS) in the unplatinated bottom strand; 2, 6: the unplatinated single strand; 3, 7: the unplatinated duplex; 4, 8: the duplex containing a unique adduct of **1**; 5, 9: the duplex containing a unique adduct of **2**.
